# Supplementary material
Source: publisher figshare collection journal article supplement (https://frontiersin.figshare.com/ndownloader/files/22146756)
Supplement: Supplementary file [file 22146756]

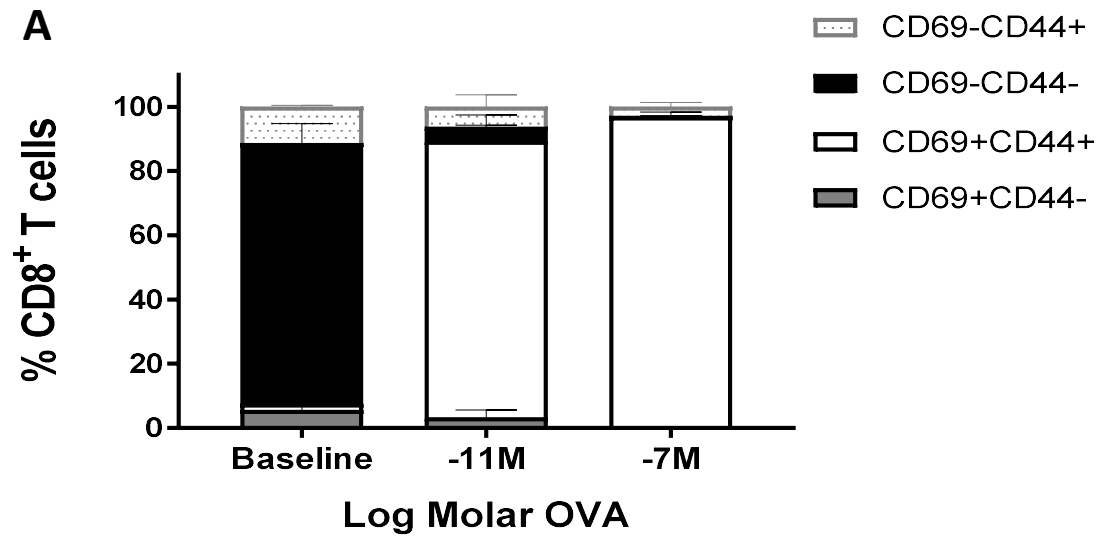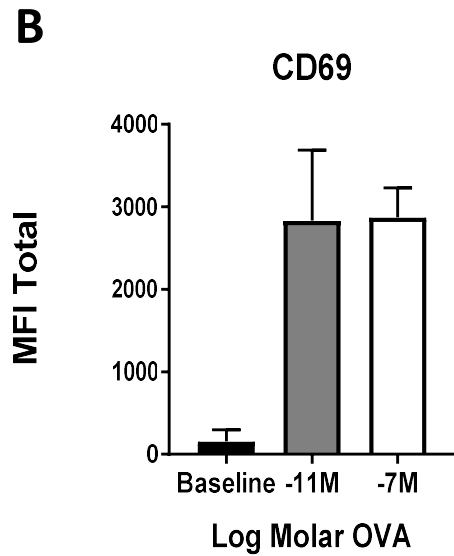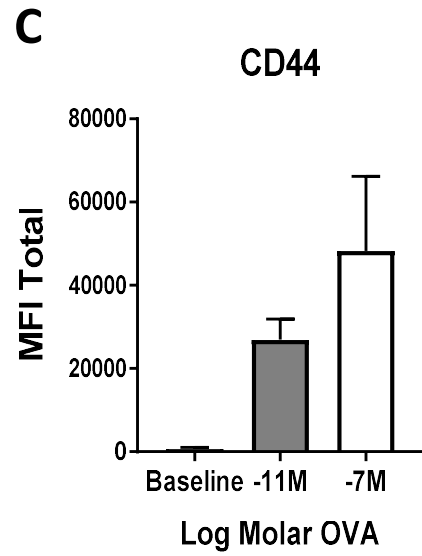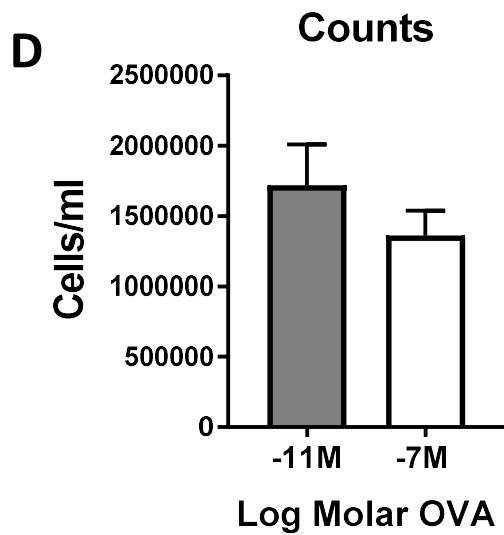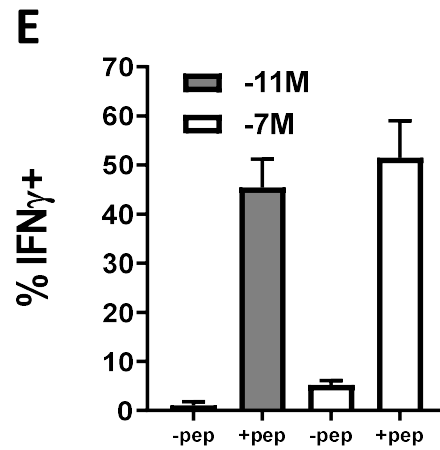

**Supplementary Fig. 1: High and low peptide/MHC engagement triggers cell activation after 48hrs of stimulation.** Splenocytes from OT-I Rag2<sup>-/-</sup> mice were stimulated with irradiated C57BL/6 splenocytes pulsed with high (10<sup>-7</sup>M) or low (10<sup>-11</sup>M) OVA<sub>257-264</sub> peptide. At 48hrs post primary stimulation cell surface CD69 and CD44 expression was measured on OT-I CD8<sup>+</sup> T cells by flow cytometry (A). Mean±SEM fluorescent intensity of CD69 (B) and CD44 (C) was assessed. (D) Cell viability was measured 7 days post primary stimulation by counting the number of live cells per ml via trypan blue exclusion, n=6. Data represent mean±SEM. (E) 7 days post primary stimulation, OT-I cultures were restimulated with 10<sup>-7</sup>M pulsed irradiated stimulators for 5 hrs. Intracellular IFN $\gamma$  producing OT-I CD8<sup>+</sup> T cells were assessed via flow cytometry. All data represent averages from 3 independent cultures.

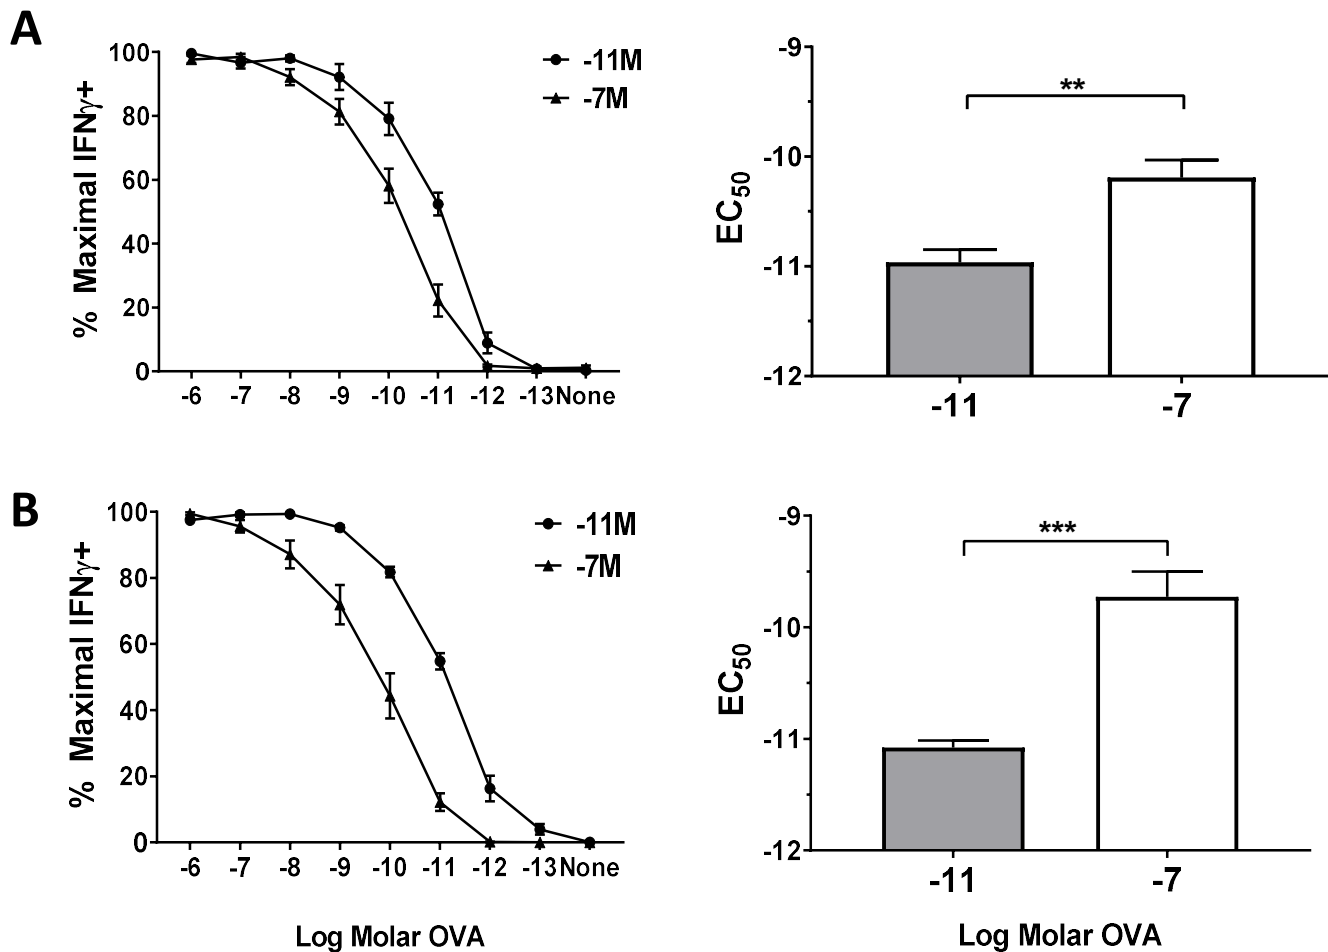

**Supplementary Fig 2: Peptide sensitivity of effector cells is regulated by the amount of antigen used for stimulation and is maintained over multiple stimulations.** Splenocytes from OT-I Rag2<sup>-/-</sup> were stimulated weekly with irradiated C57BL/6 splenocytes pulsed with a high (10<sup>-7</sup>M) or low (10<sup>-11</sup>M) concentration OVA<sub>257-264</sub> peptide. On day 5 post tertiary (A) and quaternary (B) stimulation, function was assessed by ICCS following stimulation with a range of peptide concentrations (n=6). The left panel shows the percent maximal IFN $\gamma$  production (mean $\pm$ SEM). The right panel shows the amount of peptide needed to reach half the maximal (EC<sub>50</sub>, mean $\pm$ SEM) percent of IFN $\gamma$ -producing cells. Significance was assessed by a two-tailed unpaired t test. \*\*p = < 0.01, \*\*\*p = < 0.001.

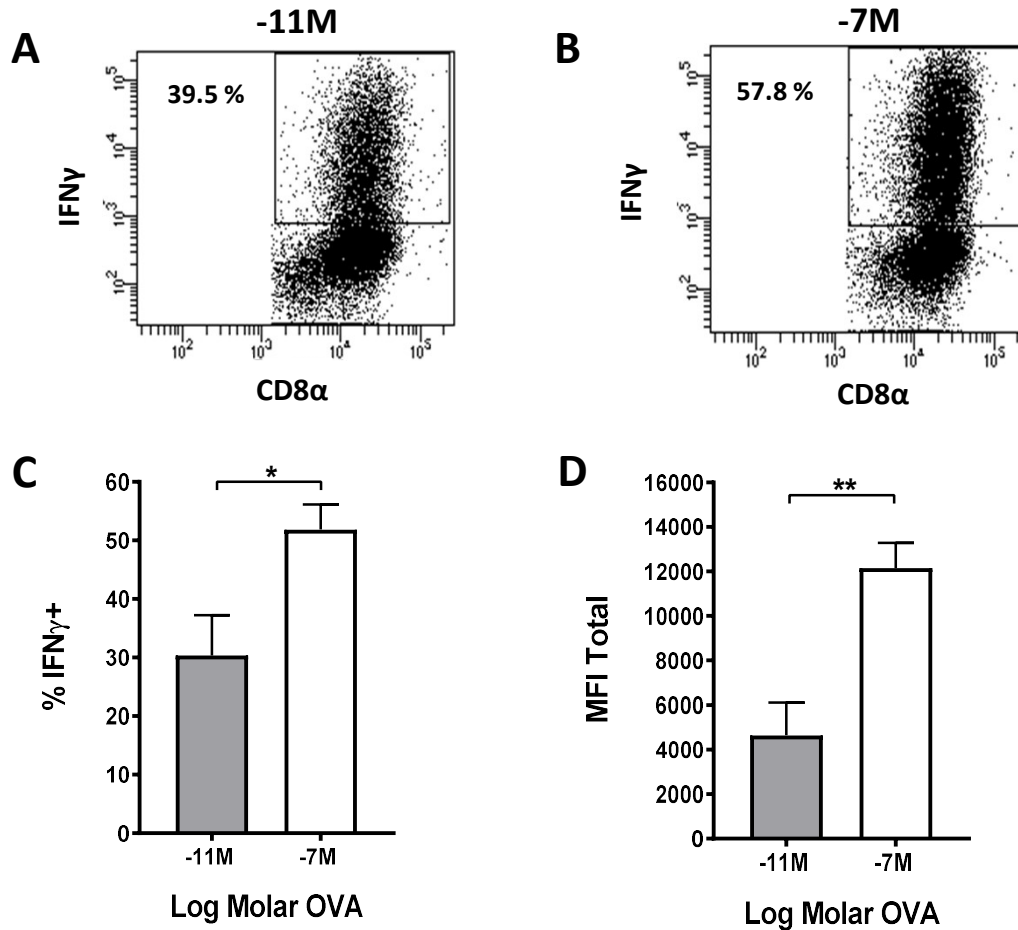

**Supplementary Figure 3: The increased IFN $\gamma$  detected in culture supernatants following stimulation with high peptide is the combined result of a higher percentage of cells producing IFN $\gamma$  and a higher amount produced on a per cell basis.** Splenocytes from OT-I Rag2<sup>-/-</sup> mice were stimulated with irradiated C57BL/6 splenocytes pulsed with high (10<sup>-7</sup>M) or low (10<sup>-11</sup>M) OVA<sub>257-264</sub> peptide. At 48hrs post primary stimulation, brefeldin A was added to the cultures to measure production of IFN $\gamma$  resulting from the initial activation of the cells. IFN $\gamma$  was assessed 5 hours later by flow cytometry. Representative plots showing the percent of IFN $\gamma$ <sup>+</sup> CD8 $\alpha$ <sup>+</sup> OT-I cells pulsed with either low (10<sup>-11</sup>M) (A) or high (10<sup>-7</sup>M) (B) OVA<sub>257-264</sub> peptide. The mean $\pm$ SEM percent of IFN $\gamma$ <sup>+</sup>CD8 $\alpha$ <sup>+</sup> OT-I cells (C) and IFN $\gamma$  MFI (D) was determined from 3 independent cultures. Significance was assessed by a one-tailed unpaired t test. \* p = < 0.05, \*\*p = < 0.01.

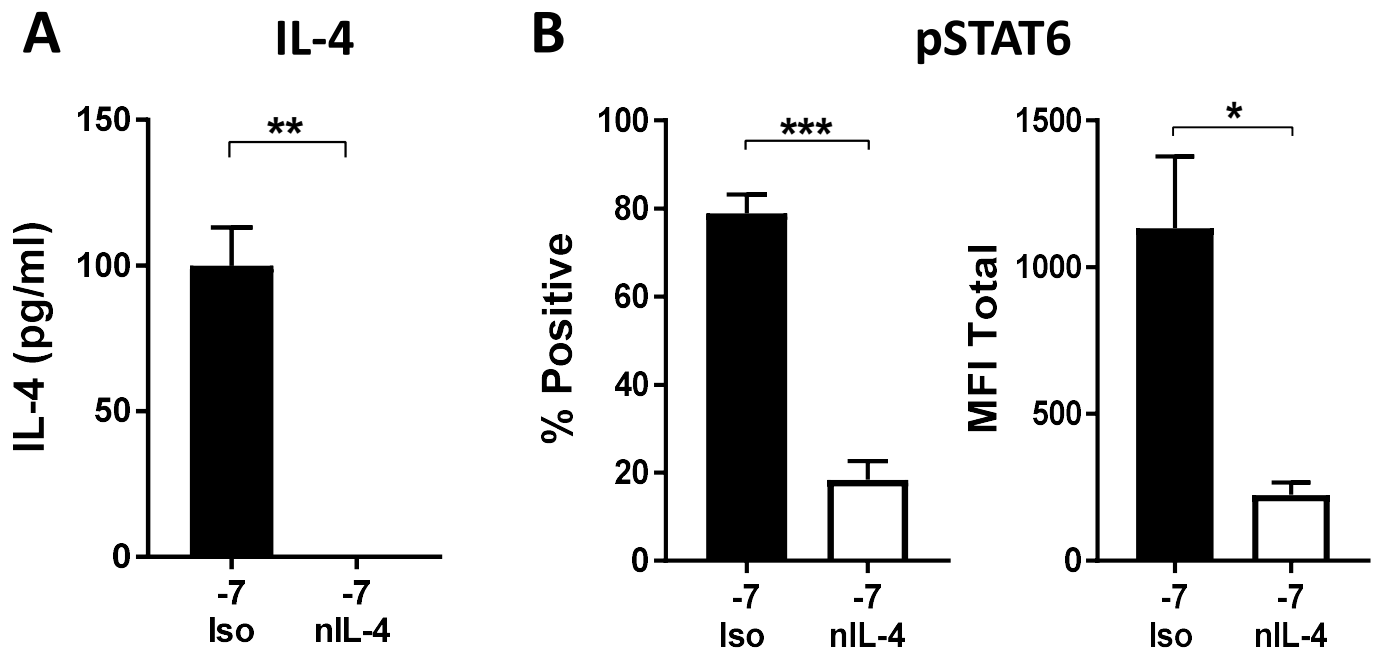

**Supplementary Figure 4: Neutralization of autocrine IL-4 results in decreased phosphorylation of STAT6 signaling.** Naïve splenocytes from TCR transgenic OT-I Rag2<sup>-/-</sup> mice were stimulated with irradiated splenocytes pulsed with high (10<sup>-7</sup>M) OVA<sub>257-264</sub> peptide. Neutralizing antibody to IL-4 was added (5 µg/ml) at the initiation of the culture. Supernatants were harvested at 48 hours following primary stimulation. IL-4 production was assessed by ELISA (A). Cells were stained for pSTAT6 and assessed using flow cytometry. Averaged data for the percentage of CD8<sup>+</sup> T cells positive for pSTAT6 (B left panel) and the MFI of pSTAT6 in the CD8<sup>+</sup> T cell population (B right panel) was assessed. Data represent the mean±SEM from 3 independent cultures. Statistical significance was assessed using a two-tailed unpaired t test. \* p = < 0.05, \*\*p = < 0.01, \*\*\*p = < 0.001.

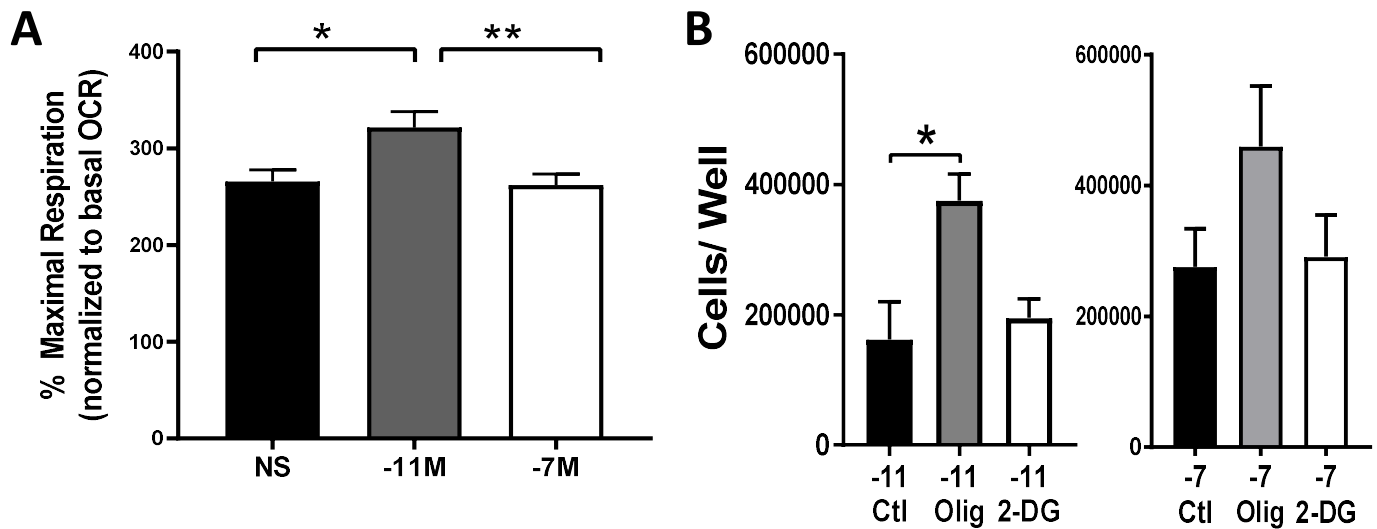

**Supplementary Figure 5:** Splenocytes from OT-I Rag2<sup>-/-</sup> mice were stimulated with irradiated C57BL/6 splenocytes pulsed with either a high (10<sup>-7</sup>M) or low (10<sup>-11</sup>M) concentration of OVA<sub>257-264</sub> peptide or left untreated. OCR was measured by seahorse analysis at 8hrs. The data shown are the percent maximal respiration normalized to the baseline OCR level from 3 independent experiments (mean±SEM). The maximal respiration was assessed after normalization to the basal OCR levels. OT-I cells were stimulated with high (10<sup>-7</sup>M), low (10<sup>-11</sup>M) or no (NS) OVA<sub>257-264</sub> peptide/MHC. Cultures were treated with or without oligomycin (1μM) or 2-DG (10mM), cell viability was assessed using Trypan blue exclusion, n=3-5 (B). Statistical significance was assessed by a one-way ANOVA with multiple comparisons. \*p = < 0.05, \*\*p = < 0.01. n=3.

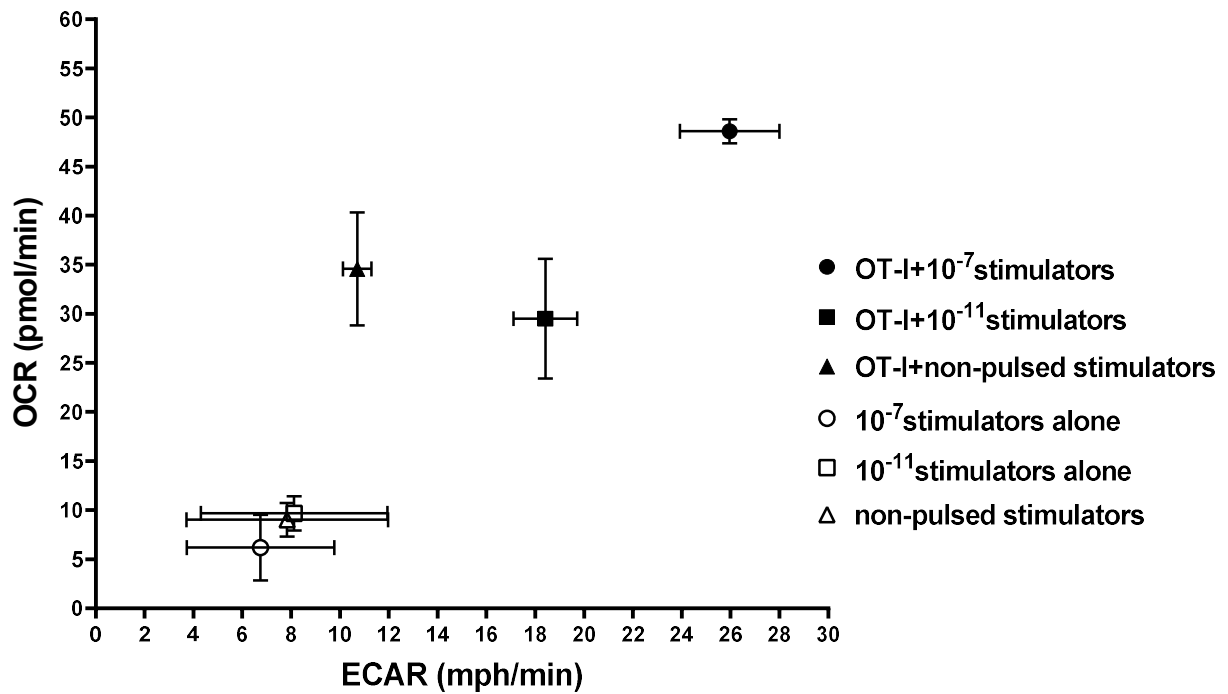

**Supplementary Figure 6: The ECAR/OCR ratio is similar in OT-I cells stimulated with high versus low peptide.** Splenocytes from OT-I Rag2<sup>-/-</sup> mice were stimulated with irradiated C57BL/6 splenocytes pulsed with high ( $10^{-7}$ M) or low ( $10^{-11}$ M) concentrations OVA<sub>257-264</sub> peptide or unstimulated. Naïve irradiated splenocytes only were included as a negative control. OCR and ECAR was measured by seahorse analysis at 8hrs, n=3. The irradiated stimulator cells showed low bioenergetic activity and no difference in metabolic rate, indicating that these do not contribute to the bioenergetic profiles of activated T cells.
